# Supplementary material
Source: ML conference proceedings conference paper supplement (https://openaccess.thecvf.com/content/ICCV2025/html/Litman_LightSwitch_Multi-view_Relighting_ICCV_2025_paper.html)
Supplement: Supplementary file 1 [file Litman_LightSwitch_Multi-view_Relighting_ICCV_2025_supplemental.pdf]

# LightSwitch: Multi-view Relighting with Material-guided Diffusion

## Supplementary Material

| Method             | Relighting        |                   |                 |                    |
|--------------------|-------------------|-------------------|-----------------|--------------------|
|                    | PSNR-L $\uparrow$ | PSNR-H $\uparrow$ | SSIM $\uparrow$ | LPIPS $\downarrow$ |
| <b>LightSwitch</b> | 32.02             | 25.03             | 0.976           | 0.027              |
| Neural-PBIR        | 33.26             | 26.01             | 0.979           | 0.023              |
| IllumiNeRF         | 32.74             | 25.56             | 0.976           | 0.027              |
| NVDiffrecMC        | 31.60             | 24.43             | 0.972           | 0.036              |
| RelitLRM           | 31.52             | 24.67             | 0.969           | 0.032              |
| InvRender          | 30.83             | 23.76             | 0.970           | 0.046              |
| NeRFactor          | 30.38             | 23.54             | 0.969           | 0.048              |
| NVDiffrec          | 29.72             | 22.91             | 0.963           | 0.039              |

Table 1. 3D Relighting Comparison on Stanford-ORB.

### 1. Additional Visualizations

We show additional visualizations of LightSwitch’s 2D and 3D relighting on BlenderVault 2D data as well as NeRF-Synthetic in Figs. 1-4.

### 2. Additional Details

**Training.** LightSwitch was trained in three stages using 8 RTX A6000 GPUs, first by finetuning for single view for 20K iterations on  $256 \times 256$  data with a batch size of 512. An AdamW 8-bit optimizer was used with a learning rate of  $5e - 5$ . For the second multi-view stage, we train with a batch size of 120, with each batch containing four  $256 \times 256$  images randomly sampled for the object. This was done for 15K iterations with a learning rate of  $2.5e - 5$ . For the last upsampling stage, a batch size of 28 was used, where each batch contained four  $512 \times 512$  images. This was done with a learning for 15K iterations with a learning rate of  $1e - 5$ . We repeat the upsampling stage training for Stable-MaterialMV in order to create higher quality material maps.

**Stanford-ORB Relighting Evaluation.** We report results in Tab. 1, showing LightSwitch is competitive with SOTA while performing significantly faster – relighting a scene in 8 minutes vs. several hours for baselines. Due to lighting changes when moving the capture device, Stanford-ORB has *separate* environment maps for each test view. As our multi-view method relights query views under a common illumination, we disregard the variation and assume the lighting for the first image but this may be suboptimal.

|                    | <b>Mic</b> |       | <b>Hotdog</b> |       | <b>Chair</b> |       | <b>Lego</b> |       | <b>Materials</b> |       |
|--------------------|------------|-------|---------------|-------|--------------|-------|-------------|-------|------------------|-------|
| <b>Method</b>      | PSNR       | LPIPS | PSNR          | LPIPS | PSNR         | LPIPS | PSNR        | LPIPS | PSNR             | LPIPS |
| <b>LightSwitch</b> | 30.24      | 0.025 | 25.91         | 0.090 | 26.65        | 0.062 | 23.60       | 0.081 | 22.08            | 0.080 |
| MaterialFusion     | 30.46      | 0.045 | 23.09         | 0.153 | 25.40        | 0.084 | 21.87       | 0.145 | 20.47            | 0.158 |
| NVDiffrecMC        | 29.81      | 0.052 | 22.88         | 0.159 | 25.39        | 0.083 | 22.04       | 0.141 | 20.50            | 0.157 |
| TensoIR            | 30.92      | 0.024 | 21.12         | 0.179 | 24.82        | 0.082 | 21.37       | 0.100 | 22.01            | 0.107 |
| R3DGS              | 28.87      | 0.033 | 20.89         | 0.179 | 23.08        | 0.084 | 20.38       | 0.129 | 20.48            | 0.101 |

Table 2. **Relighting on the NeRF-Synthetic Dataset.** We report the performance of all other baselines when their images are encoded/decoded using the Stable Diffusion encoder and decoder before comparison. The VAE causes significant drops in relighting quality for all objects, especially those with reflections sharp fine reflections such as materials, which explains our method’s struggle on the object.

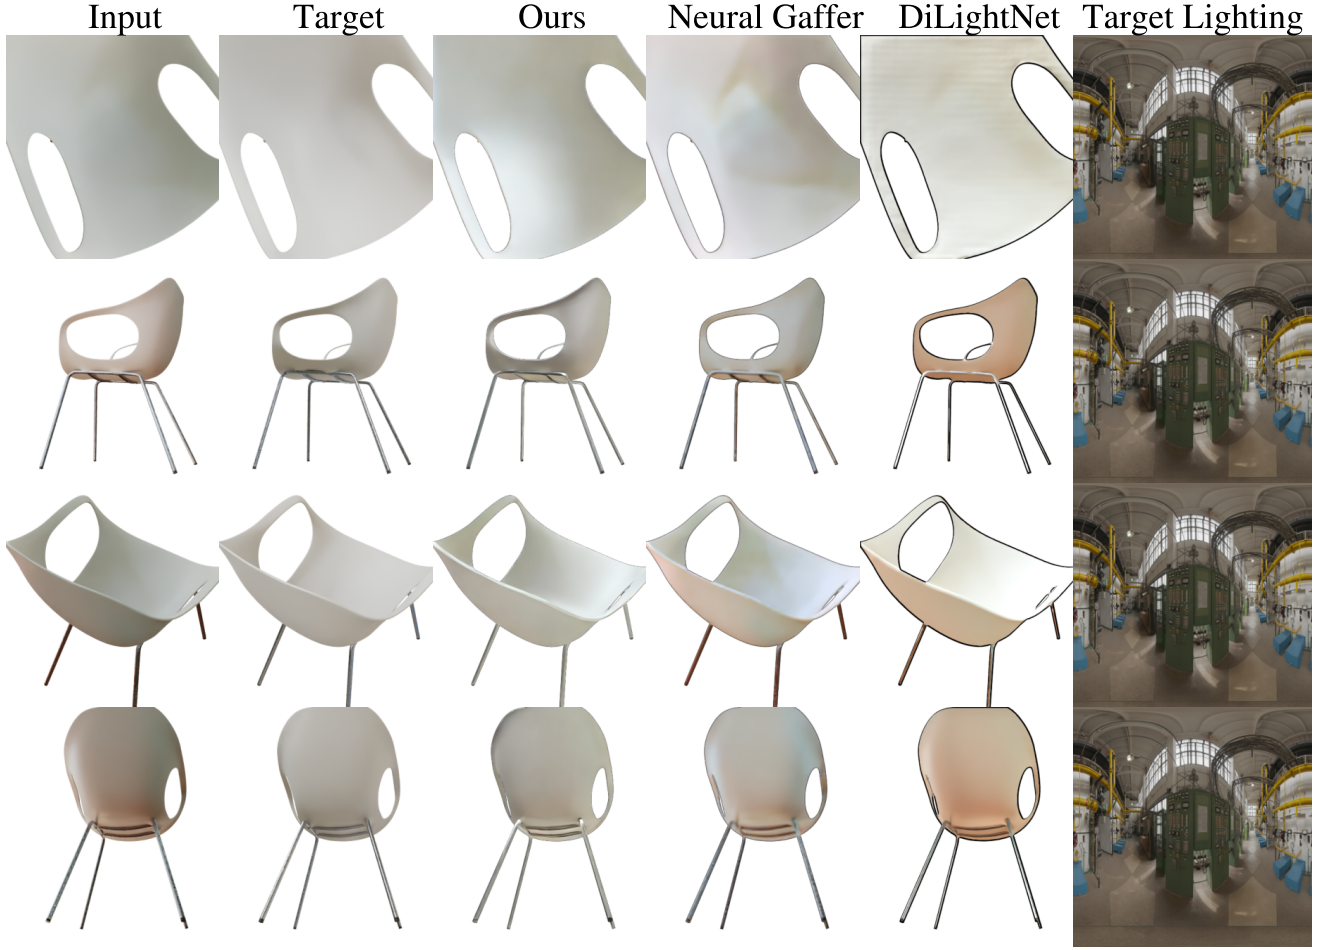

Figure 1. **Additional Visualizations of LightSwitch Relighting on Synthetic Objects.**

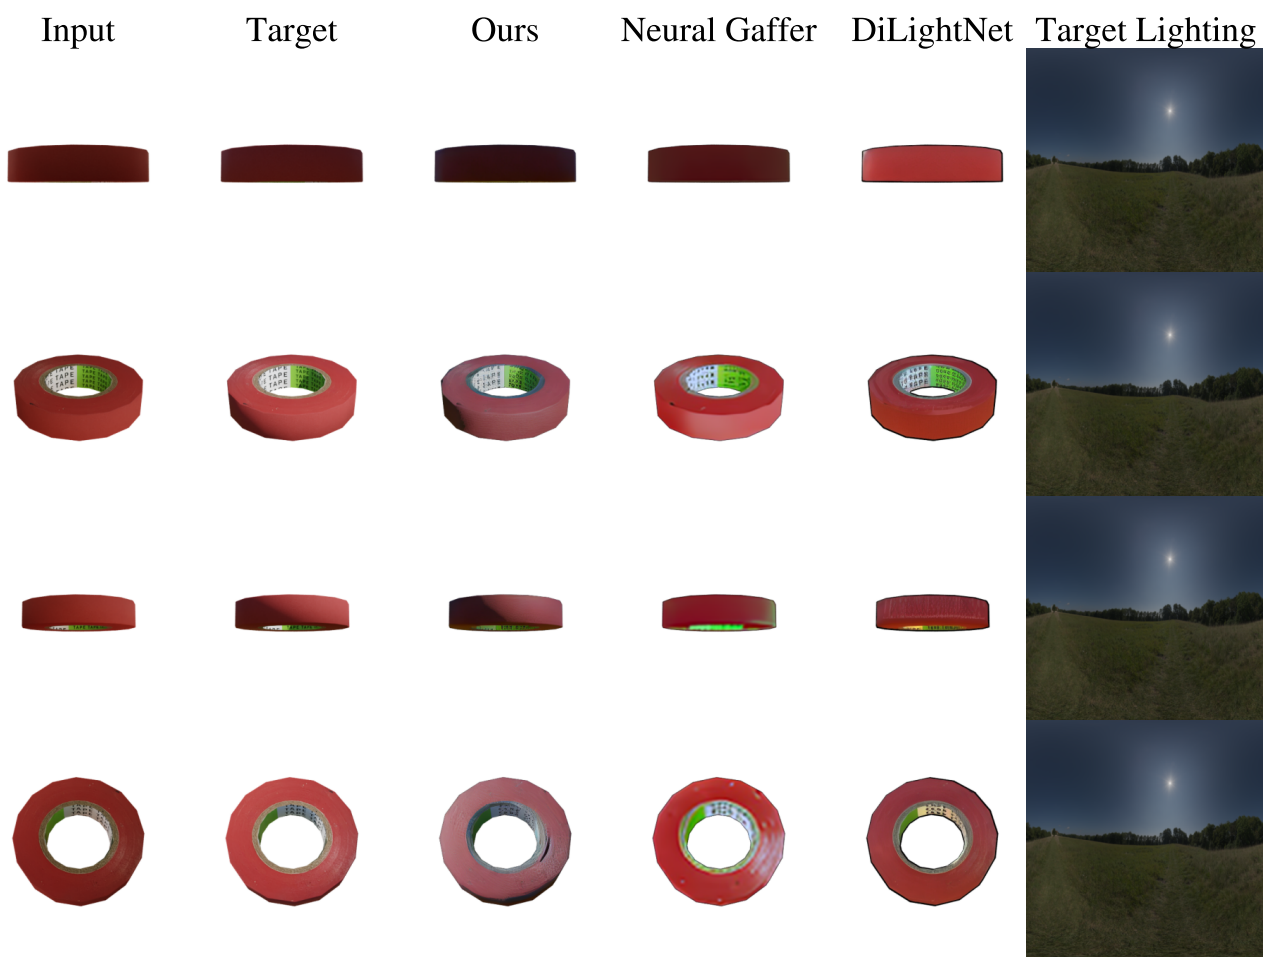

Figure 2. Additional Visualizations of LightSwitch Relighting on Synthetic Objects.

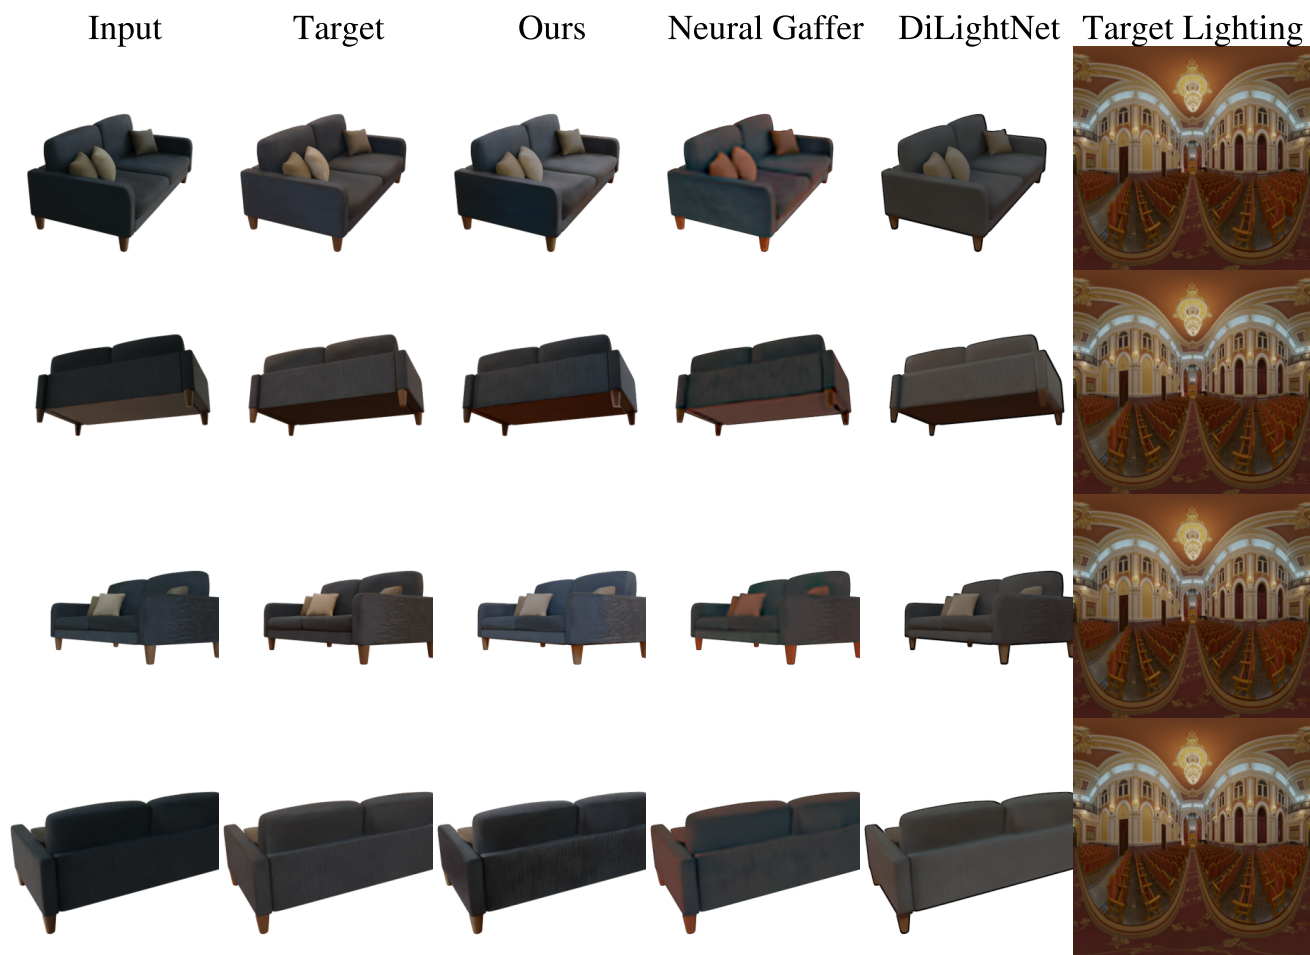

Figure 3. Additional Visualizations of LightSwitch Relighting on Synthetic Objects.

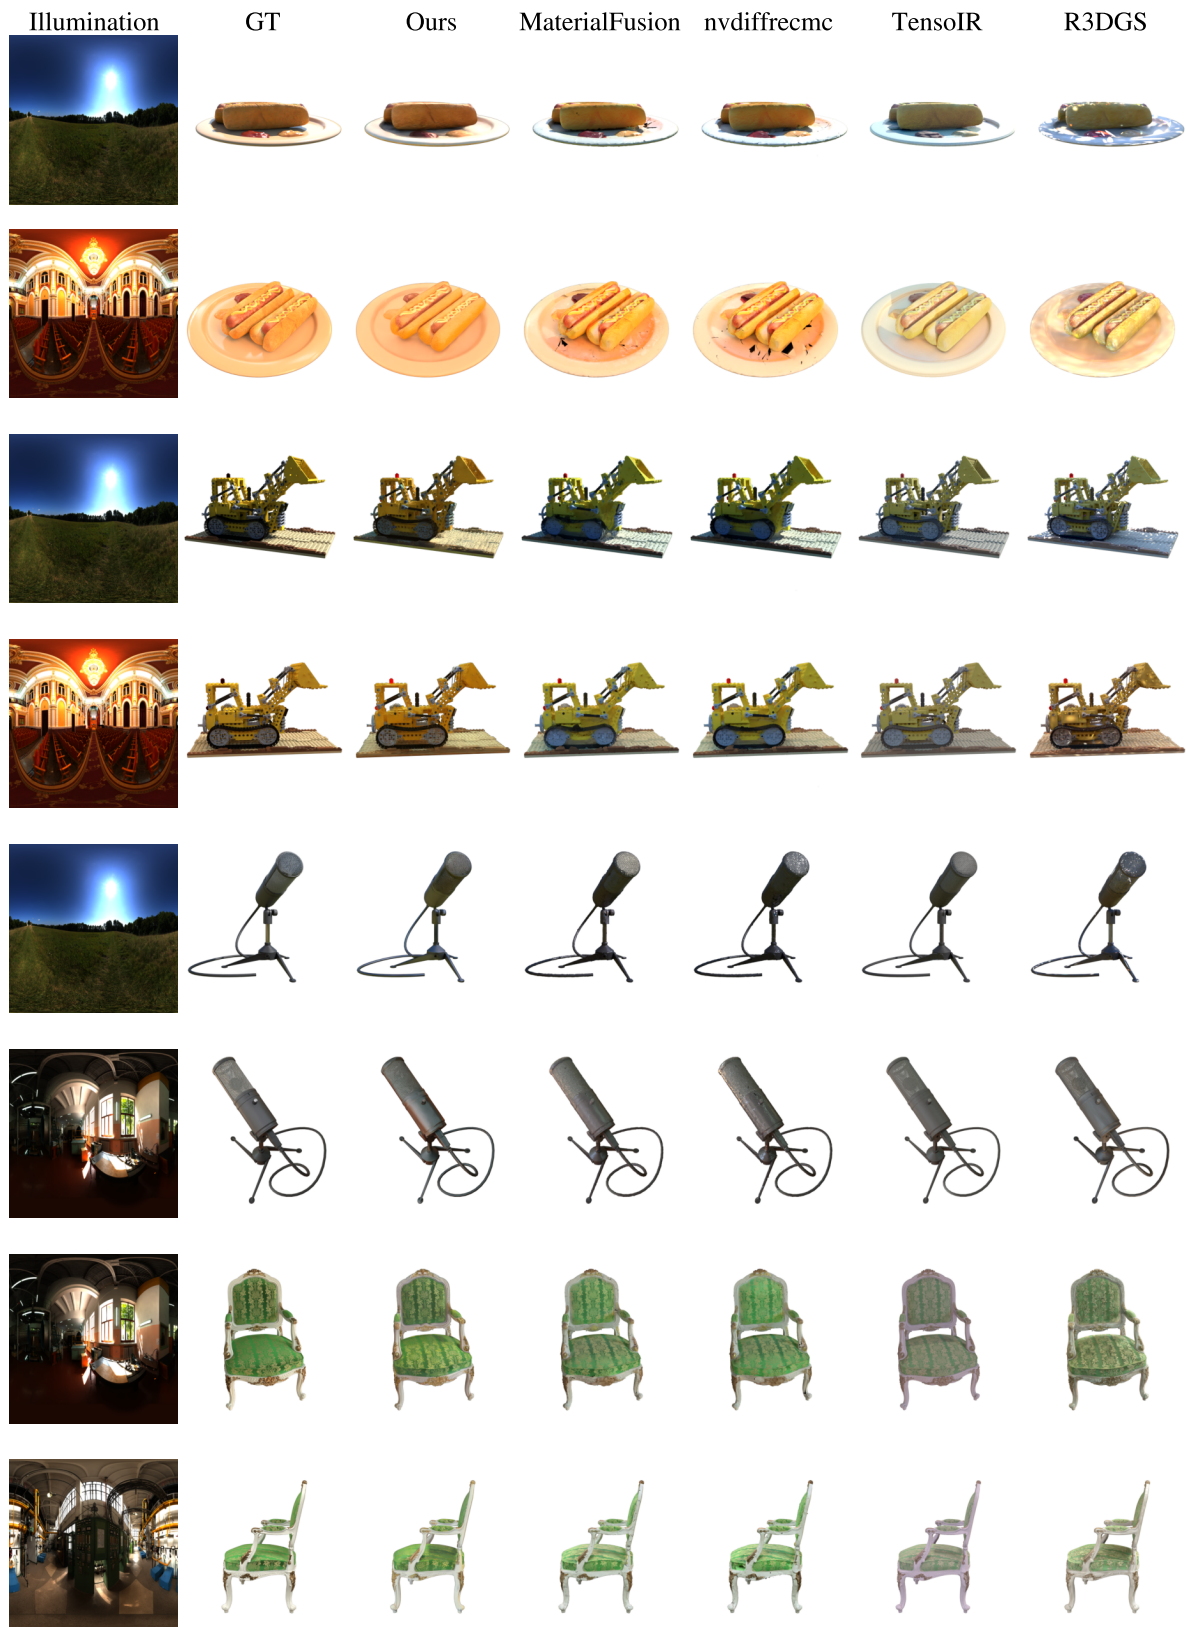

Figure 4. Additional Visualizations of LightSwitch 3D Relightings on NeRF-Synthetic.
